# Supplementary material for: GenomeGraphs: integrated genomic data visualization with R
Source: Springer Nature journal article supplement (doi:10.1186/1471-2105-10-2), 2009-01-06

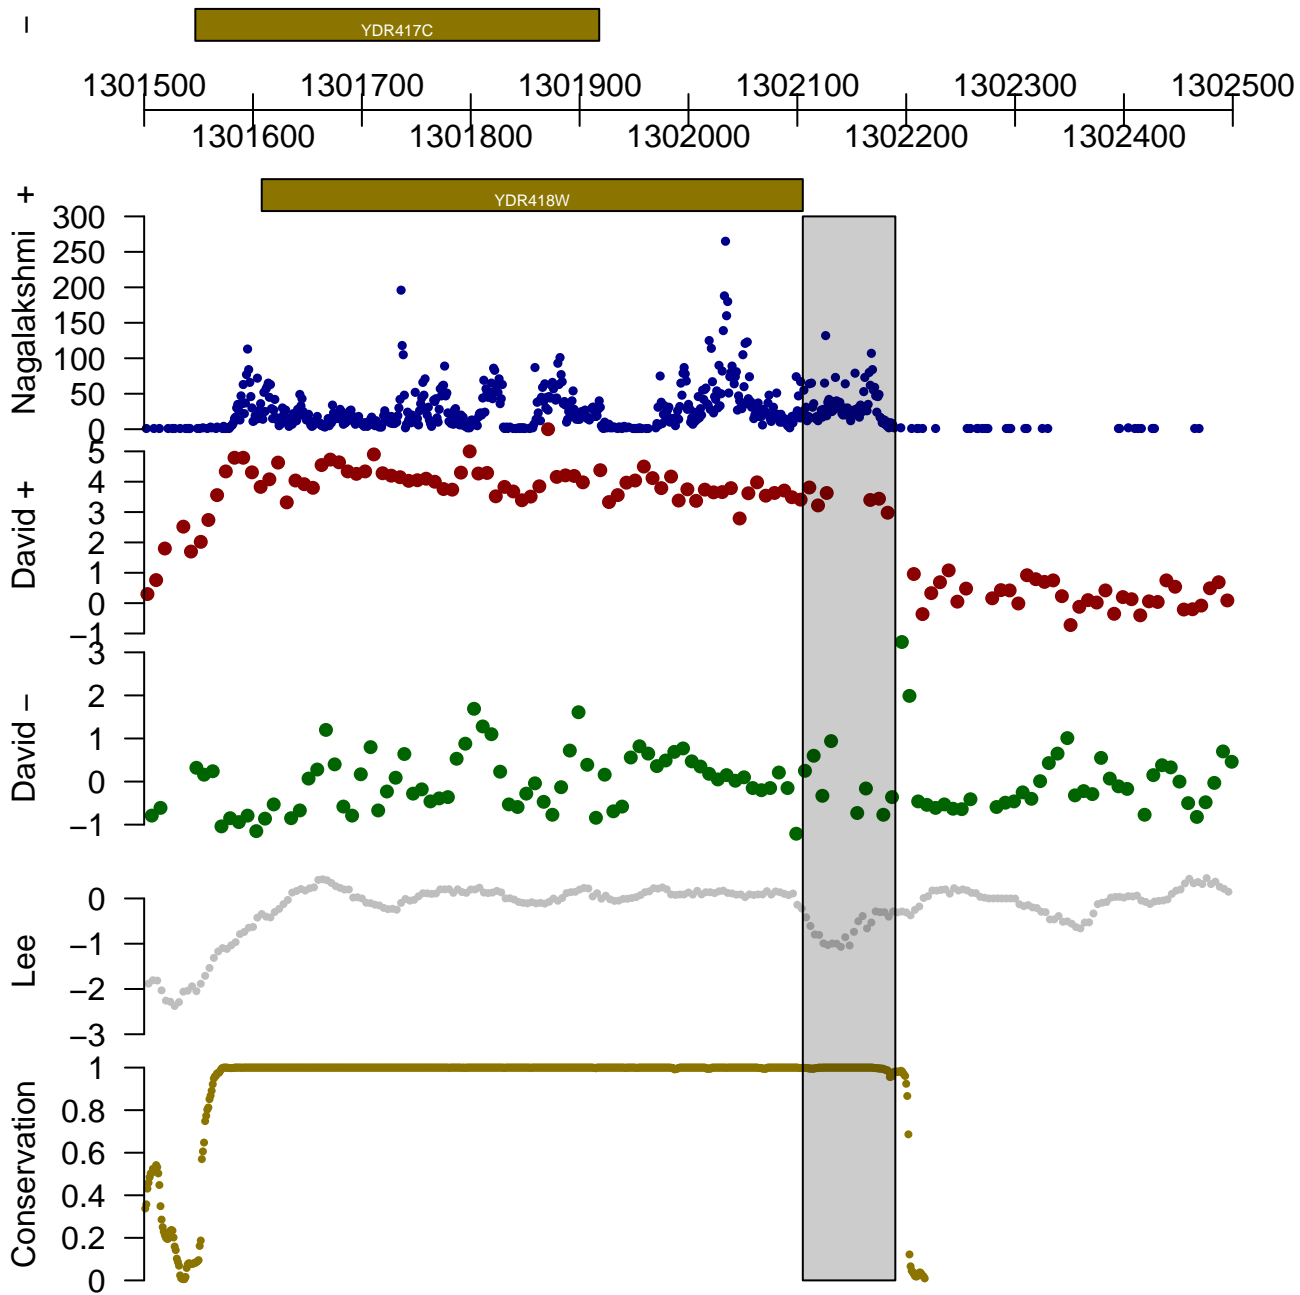

Supplement: 12859_2008_2732_MOESM3_ESM.pdf [file 12859_2008_2732_MOESM3_ESM.pdf]
